# Supplementary material for: Detection of sexually transmitted pathogens and co-infection with human papillomavirus in women residing in rural Eastern Cape, South Africa
Source: PeerJ. 2021 Mar 3;9:e10793. doi: 10.7717/peerj.10793 (PMC7936566; doi:10.7717/peerj.10793)
Supplement: Supplemental Information 1 [file peerj-09-10793-s001.xlsx]

## Sheet: Sheet1
Study number	Age	During the past year, with how many people have you had sexual intercourse?	During the past 1 month, with how many people did you have sexual intercourse?	During your life, with how many people have you had sexual intercourse?	The LAST TIME you had sexual intercourse, did you or your partner use a condom?	How many times have you had VAGINAL sex in the past 1-month?	Are you or your partner currently using any kind of contraception?	Have you ever been pregnant?	Have you had vaginal discharge that causes itching or foul smell that has caused you some worry?	IF YES, When was the last time it occurred?	Clinician Observation: Discharge	Clinician Observation: Discharge	Rapid HIV test results	HR-HPV (HC-2)	Mycoplama hominis	Ureaplasmas species	Tricomonas vaginalis	Herpes simplex virus-1	Herpes simplex virus-2	Chlamydia trachomatis	Neisseria gonorrhoeae	Mycoplasma genitalium	Treponema pallidum	Haemophilus ducreyi	STD RESULTS	STI results	Overall prevalence of pathogens	Overall prevalence of treatable STIs	Single and Multiple infection with HPV	STI results with HPV
BE002	55	1	0	1	No	0	Don't know	Yes	No		Absent		Negative	Negative	Negative	Positive	Negative	Negative	Negative	Negative	Negative	Negative	Negative	Negative	Ureaplasmas species	UU	Positive	negative	single infection	UU
BE003	50	1	1	5	No	2	No	Yes	Yes	More than 6 months ago	Absent		Negative	Positive	Positive	Positive	Negative	Negative	Negative	Negative	Negative	Negative	Negative	Negative	Mycoplasma hominis, Ureplasmas species	MH,UU	Positive	negative	multiple infection	MH,UU,HPV
BE004	59	1	1	3	Yes	1	No	Yes	No		Absent		Negative	Negative	Negative	Negative	Negative	Negative	Negative	Negative	Negative	Negative	Negative	Negative	Negative	Negative	Negative	negative	Negative	Negative
BE005	48	1	1	1	Yes	4	No	Yes	Yes	More than 6 months ago	Absent		Positive	Positive	Negative	Positive	Negative	Negative	Positive	Negative	Negative	Negative	Negative	Negative	Ureaplasmas species, Herpes simplex virus-2	UU,HSV-2	Positive	negative	multiple infection	UU,HSV-2,HPV
BE006	34	1	1	18	No	4	No	Yes	Yes	More than 6 months ago			Negative	Positive	Positive	Positive	Positive	Negative	Negative	Negative	Negative	Negative	Negative	Negative	Mycoplasma hominis, Ureplasmas species, Tricomonas vaginalis	MH,UU,TV	Positive	positive	multiple infection	MH,UU,TV,HPV
BE007	53	0	0	1	Yes	0		Yes	No		Absent		Negative	Negative	Negative	Negative	Negative	Negative	Negative	Negative	Negative	Negative	Negative	Negative	Negative	Negative	Negative	negative	Negative	Negative
BE008	56	1	1	3	No	0	Yes	Yes	Yes	More than 1 week but less than a month ago	Absent		Positive	Negative	Negative	Positive	Negative	Negative	Negative	Positive	Negative	Negative	Negative	Negative	Ureplasmas species, Chlamydia trachomatis (Serotypes A-K)	UU,CT	Positive	positive	multiple infection	UU,CT
BE009	33	1	1	2	Yes	1	Yes	Yes	No		Absent		Positive	Positive	Negative	Positive	Positive	Negative	Negative	Negative	Negative	Negative	Negative	Negative	Tricomonas vaginalis, Ureplasmas species	TV,UU	Positive	positive	multiple infection	TV,UU,HPV
BE010	41	1	0	2	Yes	0	Yes	Yes	No		Absent		Negative	Positive	Positive	Positive	Positive	Negative	Negative	Negative	Negative	Negative	Negative	Negative	Mycoplasma hominis, Ureplasmas species, Tricomonas vaginalis	MH,UU,TV	Positive	positive	multiple infection	MH,UU,TV,HPV
BE011	42	1	1	5	No	2	Yes	Yes	No		Absent		Negative	Negative	Positive	Positive	Negative	Negative	Negative	Negative	Negative	Negative	Negative	Negative	Mycoplasma hominis, Ureplasmas species	MH,UU	Positive	negative	multiple infection	MH,UU
BE012	51	1	0	3	Yes	1	Yes	Yes	Yes	More than 6 months ago	Absent		Positive	Negative	Negative	Negative	Negative	Negative	Negative	Negative	Negative	Negative	Negative	Negative	Negative	Negative	Negative	negative	Negative	Negative
BE013	32	1	1	2	Yes	1	Yes	Yes	No		Absent		Positive	Negative	Positive	Positive	Positive	Negative	Negative	Positive	Positive	Negative	Negative	Negative	Mycoplama hominis, Ureplasmas species, Tricomonas vaginalis, Chlamydia trachomatis (Serotypes A-K), Neisseria gonohoeae	MH,UU,TV,CT,NG	Positive	positive	multiple infection	MH,UU,TV,CT,NG
BE014	46	1	1	2	No	0	Yes	Yes	Yes	More than 6 months ago	Absent		Negative	Negative	Positive	Positive	Positive	Negative	Negative	Negative	Negative	Negative	Negative	Negative	Mycoplasma hominis, Ureplasmas species, Tricomonas vaginalis	MH,UU,TV	Positive	positive	multiple infection	MH,UU,TV
BE015	32	3	1	15	Yes	5	Yes	Yes	Yes	More than 6 months ago	Present	Whitish Pv discharge	Negative	Negative	Positive	Positive	Negative	Negative	Negative	Negative	Negative	Negative	Negative	Negative	Mycoplasma hominis, Ureplasmas species	MH,UU	Positive	negative	multiple infection	MH,UU
BE016	51	1	1	2		1	No	Yes	Yes	More than 6 months ago	Absent		Negative	Positive	Negative	Negative	Negative	Negative	Negative	Negative	Negative	Negative	Negative	Negative	Negative	Negative	Negative	negative	single infection	HPV
BE017	57	0	0	2	No	0	No	Yes	No		Absent		Positive	Positive	Negative	Negative	Negative	Negative	Negative	Negative	Negative	Negative	Negative	Negative	Negative	Negative	Negative	negative	single infection	HPV
BE018	30	1	1	4	Yes	1	Yes	Yes	No		Absent		Positive	Positive	Positive	Positive	Negative	Negative	Negative	Negative	Negative	Negative	Negative	Negative	Mycoplasma hominis, Ureplasmas species	MH,UU	Positive	negative	multiple infection	MH,UU,HPV
BE019	51	0	0	5	Yes	0	No	Yes	Yes	More than 6 months ago	Absent		Positive	Negative	Positive	Positive	Negative	Negative	Negative	Negative	Negative	Negative	Negative	Negative	Mycoplasma hominis, Ureplasmas species	MH,UU	Positive	negative	multiple infection	MH,UU
BE020	51	1	0	5	Yes	0	Yes	Yes	Yes	More than 6 months ago	Absent		Positive	Negative	Positive	Positive	Positive	Negative	Negative	Negative	Negative	Negative	Negative	Negative	Mycoplasma hominis, Ureplasmas species, Tricomonas vaginalis	MH,UU,TV	Positive	positive	multiple infection	MH,UU,TV
BE021	51	0	0	2	No	0	No	Yes	No		Absent		Negative	Negative	Positive	Positive	Negative	Negative	Negative	Negative	Negative	Negative	Negative	Negative	Mycoplasma hominis, Ureplasmas species	MH,UU	Positive	negative	multiple infection	MH,UU
BE022	38	1	1	3	No	1	Yes	Yes	No		Absent		Positive	Negative	Positive	Positive	Positive	Negative	Positive	Negative	Negative	Negative	Negative	Negative	Mycoplasma hominis, Ureplasmas species, Tricomonas vaginalis, Herpex simplex-virus	MH,UU,TV, HSV-2	Positive	positive	multiple infection	MH,UU,TV, HSV-2
BE024	50	1	1	4	No	1	Yes	Yes	Yes	More than 6 months ago	Absent		Negative	Negative	Negative	Positive	Negative	Negative	Negative	Negative	Negative	Negative	Negative	Negative	Mycoplasma hominis	MH	Positive	negative	single infection	MH
BE025	37	1	1	2	No	5	No	Yes	Yes	More than 1 week but less than a month ago	Absent		Negative	Negative	Positive	Positive	Positive	Negative	Negative	Negative	Negative	Negative	Negative	Negative	Mycoplasma hominis, Ureplasmas species, Tricomonas vaginalis	MH,UU,TV	Positive	positive	multiple infection	MH,UU,TV
BE026	48	0	0	3	No	0	No	Yes	Yes	More than 6 months ago	Absent		Negative	Positive	Positive	Positive	Negative	Negative	Negative	Negative	Negative	Negative	Negative	Negative	Mycoplasma hominis, Ureplasmas species	MH,UU	Positive	negative	multiple infection	MH,UU,HPV
BE027	65	0	0	2	No	0	No	Yes	Yes	More than 6 months ago	Absent		Negative	Negative	Positive	Positive	Negative	Negative	Negative	Negative	Negative	Negative	Negative	Negative	Mycoplasma hominis, Ureplasmas species	MH,UU	Positive	negative	multiple infection	MH,UU
BE028	55	0	1	4	Yes	0	Yes	Yes	No		Absent		Positive	Negative	Positive	Positive	Negative	Negative	Negative	Negative	Negative	Negative	Negative	Negative	Mycoplasma hominis, Ureplasmas species	MH,UU	Positive	negative	multiple infection	MH,UU
BE029	50	1	1	4	Yes	0	Yes	Yes	Yes	More than 6 months ago	Absent		Negative	Negative	Negative	Positive	Negative	Negative	Negative	Negative	Negative	Negative	Negative	Negative	Ureplasmas species	UU	Positive	negative	single infection	UU
BE030	57	0	0	5	No	0	No	Yes	No		Absent		Negative	Negative	Positive	Negative	Positive	Negative	Negative	Negative	Negative	Negative	Negative	Negative	Mycoplasma hominis, Tricomonas vaginalis	MH,TV	Positive	positive	multiple infection	MH,TV
BE031	39	1	1	3	No	0	Yes	Yes	No		Present	Whitish PV discharge.	Negative	Positive	Negative	Positive	Negative	Negative	Negative	Negative	Negative	Negative	Negative	Negative	Ureplasmas species	UU	Positive	negative	multiple infection	UU,HPV
BE032	31	1	1	3	Yes	8	No	Yes	Yes	More than 6 months ago	Present	Whitish PV discharge.	Positive	Negative	Positive	Positive	Negative	Negative	Negative	Negative	Negative	Negative	Negative	Negative	Mycoplasma hominis, Ureplasmas species	MH,UU	Positive	negative	multiple infection	MH,UU
BE033	53	0	0	1	No	0	No	Yes	No		Absent		Negative	Negative	Negative	Positive	Negative	Negative	Negative	Negative	Negative	Negative	Negative	Negative	Ureplasmas species	UU	Positive	negative	single infection	UU
BE034	40	1	0	4	No	0	No	Yes	No		Present	Whitish PV discharge.	Negative	Negative	Positive	Positive	Negative	Negative	Positive	Negative	Negative	Negative	Negative	Negative	Mycoplasma hominis, Ureplasmas species, Herpes simplex virus-2	MH,UU,HSV-2	Positive	negative	multiple infection	MH,UU,HSV-2
BE035	41	0	0	5	Yes	0	No	Yes	Yes	More than 6 months ago	Absent		Positive	Negative	Negative	Positive	Negative	Negative	Negative	Negative	Negative	Negative	Negative	Negative	Ureplasmas species	UU	Positive	negative	single infection	UU
BE036	53	0	1	6	Yes	0	Yes	Yes	No		Absent		Positive	Positive	Negative	Negative	Negative	Negative	Negative	Negative	Negative	Negative	Negative	Negative	Negative	Negative	Negative	negative	single infection	HPV
BE037	33	1	1	2	No	5	Yes	Yes	Yes	Current	Present	Whitish cream PV discharge	Negative	Positive	Negative	Positive	Negative	Negative	Negative	Negative	Negative	Negative	Negative	Negative	Ureplasmas species	UU	Positive	negative	multiple infection	UU,HPV
BE038	49	1	1	1	No	1	No	Yes	No		Absent		Negative	Negative	Negative	Positive	Negative	Negative	Negative	Negative	Negative	Negative	Negative	Negative	Ureplasmas species	UU	Positive	negative	single infection	UU
BE039	47	1	0	3	Yes	0	No	Yes	Yes	More than 1 month but less than 6 months	Absent		Positive	Negative	Negative	Positive	Negative	Negative	Negative	Negative	Negative	Negative	Negative	Negative	Ureplasmas species	UU	Positive	negative	single infection	UU
BE040	52	0	0	3	No	0	No	Yes	No		Absent		Negative	Negative	Negative	Negative	Negative	Negative	Negative	Negative	Negative	Negative	Negative	Negative	Negative	Negative	Negative	negative	Negative	Negative
BE041	34	2	0	6	Yes	0	Yes	Yes	Yes	Current	Present	Whitish PV discharge	Negative	Negative	Negative	Positive	Negative	Negative	Negative	Negative	Negative	Negative	Negative	Negative	Ureplasmas species	UU	Positive	negative	single infection	UU
BE042	66	0	0	2	No	0	No	Yes	No		Absent		Negative	Negative	Negative	Negative	Negative	Negative	Negative	Negative	Negative	Negative	Negative	Negative	Negative	Negative	Negative	negative	Negative	Negative
BE043	37	1	0	3	Yes	0	Yes	Yes	Yes	Current	Present	Whitish PV discharge.	Positive	Positive	Negative	Negative	Negative	Negative	Negative	Negative	Negative	Positive	Negative	Negative	Mycoplasma genitalium	MG	Positive	negative	multiple infection	MG,HPV
BE044	53	1	1	1	No	1	No	Yes	Yes	Current	Present	Creamish white PV discharge	Negative	Negative	Positive	Positive	Positive	Negative	Negative	Negative	Negative	Negative	Negative	Negative	Mycoplasma hominis, Ureplasmas species, Tricomonas vaginalis	MH,UU,TV	Positive	positive	multiple infection	MH,UU,TV
BE045	31	1	0	2	No	0	No	No	Yes	More than 6 months ago	Absent		Negative	Negative	Negative	Positive	Negative	Negative	Negative	Negative	Negative	Negative	Negative	Negative	Ureplasmas species	UU	Positive	negative	single infection	UU
BE046	33	0	0	2	No	0	No	No	Yes	Current	Present	Creamish PV discharge	Positive	Negative	Positive	Positive	Negative	Negative	Negative	Negative	Negative	Negative	Negative	Negative	Mycoplasma hominis, Ureplasmas species	MH,UU	Positive	negative	multiple infection	MH,UU
BE047	51	1	1	2	Yes	1	Yes	Yes	No		Absent		Positive	Positive	Negative	Negative	Negative	Negative	Negative	Negative	Negative	Negative	Negative	Negative	Negative	Negative	Negative	negative	single infection	HPV
BE048	54	1	0	1	No	0	No	Yes	No		Absent		Negative	Negative	Negative	Positive	Negative	Negative	Negative	Negative	Negative	Negative	Negative	Negative	Ureplasmas species	UU	Positive	negative	single infection	UU
BE049	53	0	0	1	No	0	No	Yes	Yes	More than 6 months ago	Absent		Negative	Negative	Negative	Positive	Negative	Negative	Negative	Negative	Negative	Negative	Negative	Negative	Ureplasmas species	UU	Positive	negative	single infection	UU
BE050	33	3	1	4	Yes	8	Yes	Yes	No		Present		Negative	Negative	Positive	Negative	Negative	Negative	Negative	Negative	Negative	Negative	Negative	Negative	Mycoplasma hominis	MH	Positive	negative	single infection	MH
BE051	39	1	1	10	Yes		Yes	Yes	No		Absent		Positive	Positive	Positive	Negative	Negative	Negative	Negative	Negative	Negative	Negative	Negative	Negative	Mycoplasma hominis	MH	Positive	negative	multiple infection	MH,HPV
BE052	56	0	0	2	No	0	No	Yes	No		Absent		Negative	Positive	Negative	Positive	Negative	Negative	Negative	Negative	Negative	Negative	Negative	Negative	Ureplasmas species	UU	Positive	negative	multiple infection	UU,HPV
BE053	40	1	1	2	Yes	4	No	Yes	Yes	Current	Present	Creamish white PV discharge.	Positive	Positive	Negative	Positive	Negative	Negative	Negative	Negative	Negative	Negative	Negative	Negative	Ureplasmas species	UU	Positive	negative	multiple infection	UU,HPV
BE054	42	1	1	2		2	Yes	Yes	Yes	More than 6 months ago	Absent		Positive	Negative	Negative	Positive	Negative	Negative	Negative	Negative	Negative	Negative	Negative	Negative	Ureplasmas species	UU	Positive	negative	single infection	UU
BE055	44	1	1	2	No	0	Yes	Yes	No		Absent		Negative	Negative	Positive	Positive	Negative	Negative	Negative	Negative	Negative	Negative	Negative	Negative	Mycoplasma hominis, Ureplasmas species	MH,UU	Positive	negative	multiple infection	MH,UU
BE056	36	1	1	1	Yes	1	No	Yes	No		Present	Whitish grey PV discharge.	Negative	Negative	Negative	Negative	Negative	Negative	Negative	Negative	Negative	Negative	Negative	Negative	Negative	Negative	Negative	negative	Negative	Negative
BE057	38	1	0	2	No	0	No	Yes	No		Absent		Negative	Negative	Negative	Positive	Negative	Negative	Negative	Negative	Negative	Negative	Negative	Negative	Ureplasmas species	UU	Positive	negative	single infection	UU
BE058	43	0	0	3	Yes	0	Yes	Yes	No		Absent		Positive	Negative	Negative	Positive	Negative	Negative	Negative	Negative	Negative	Negative	Negative	Negative	Ureplasmas species	UU	Positive	negative	single infection	UU
BE059	47	0	0	3	No	0	No	Yes	Yes	More than 1 month but less than 6 months	Absent		Positive	Positive	Positive	Positive	Negative	Negative	Positive	Negative	Negative	Negative	Negative	Negative	Mycoplasma hominis, Ureplasmas species, Herpes simplex virus-2	MH,UU,HSV-2	Positive	negative	multiple infection	MH,UU,HSV-2,HPV
BE060	64	1	1	1	Yes	0	No	Yes	No		Absent		Positive	Negative	Negative	Negative	Negative	Negative	Negative	Negative	Negative	Negative	Negative	Negative	Negative	Negative	Negative	negative	Negative	Negative
BE061	59	1	0	3	No	0	No	Yes	Yes	In the last week	Present	Watery discharge	Positive	Positive	Negative	Positive	Positive	Negative	Negative	Negative	Negative	Negative	Negative	Negative	Ureplasmas species, Tricomonas vaginalis	UU,TV	Positive	positive	multiple infection	UU,TV,HPV
BE062	34	1	1	3	No	4	No	Yes	No		Absent		Positive	Positive	Negative	Positive	Negative	Negative	Negative	Negative	Negative	Negative	Negative	Negative	Ureplasmas species	UU	Positive	negative	multiple infection	UU,HPV
BE063	53	1	1	3	No	4	No	Yes	No		Absent		Negative	Negative	Positive	Positive	Negative	Negative	Negative	Negative	Negative	Negative	Negative	Negative	Mycoplasma hominis, Ureplasmas species	MH,UU	Positive	negative	multiple infection	MH,UU
BE064	38	1	7	2	No	2	No	Yes	No		Absent		Negative	Positive	Negative	Positive	Negative	Negative	Positive	Negative	Negative	Negative	Negative	Negative	Ureplasmas species, Herpes simplex virus-2	UU,HSV-2	Positive	negative	multiple infection	UU,HSV-2,HPV
BE065	32	1	0	3	Yes	0	No	Yes	No		Absent		Negative	Positive	Negative	Positive	Negative	Negative	Negative	Negative	Negative	Negative	Negative	Negative	Ureplasmas species	UU	Positive	negative	multiple infection	UU,HPV
BE066	53	0	0	6	Yes	0	Yes	Yes	Yes	More than 6 months ago	Absent		Negative	Negative	Negative	Negative	Negative	Negative	Negative	Negative	Negative	Negative	Negative	Negative	Negative	Negative	Negative	negative	Negative	Negative
BE067	46	0	0	1		0	No	Yes	No		Present	White discharge.	Negative	Negative	Negative	Positive	Negative	Negative	Negative	Negative	Negative	Negative	Negative	Negative	Ureplasmas species	UU	Positive	negative	single infection	UU
BE068	46	0	0	2	Yes	0	No	Yes	Yes	In the last week	Present	White thick discharge	Negative	Negative	Negative	Negative	Negative	Negative	Negative	Negative	Negative	Negative	Negative	Negative	Negative	Negative	Negative	negative	Negative	Negative
BE069	64	1	1	1	No	0	No	Yes	No		Absent		Negative	Negative	Negative	Positive	Negative	Negative	Negative	Negative	Negative	Negative	Negative	Negative	Ureplasmas species	UU	Positive	negative	single infection	UU
BE070	36	1	1	2	Yes	2	No	Yes	No		Present	whitish PV discharge	Negative	Negative	Positive	Positive	Negative	Negative	Negative	Positive	Negative	Negative	Negative	Negative	Mycoplasma hominis, Ureplasmas species, Chlamydia trachomonas (Serotypes A-K)	MH,UU,CT	Positive	positive	multiple infection	MH,UU,CT
BE071	43	1	1	3	Yes	3	No	Yes	Yes	In the last week	Absent		Positive	Positive	Positive	Positive	Negative	Negative	Negative	Negative	Negative	Negative	Negative	Negative	Mycoplasma hominis, Ureplasmas species	MH,UU	Positive	negative	multiple infection	MH,UU,HPV
BE072	59	0	0	1	Yes	0	No	Yes	No		Absent		Positive	Negative	Negative	Negative	Negative	Negative	Negative	Negative	Negative	Negative	Negative	Negative	Negative	Negative	Negative	negative	Negative	Negative
BE073	41	0	0	2	Yes	0	Yes	Yes	Yes	In the last week	Absent		Positive	Positive	Negative	Negative	Negative	Negative	Negative	Negative	Negative	Negative	Negative	Negative	Negative	Negative	Negative	negative	single infection	HPV
BE074	61	0	0	2	No	0	No	Yes	No		Absent		Negative	Negative	Negative	Negative	Negative	Negative	Negative	Negative	Negative	Negative	Negative	Negative	Negative	Negative	Negative	negative	Negative	Negative
BE075	59	1	1	3	No	2	No	Yes	Yes	In the last week	Absent		Positive	Positive	Negative	Positive	Negative	Negative	Negative	Negative	Negative	Negative	Negative	Negative	Ureplasmas species	UU	Positive	negative	multiple infection	UU,HPV
BE076	56	0	0	1	No	0	No	Yes	No		Absent		Negative	Negative	Negative	Negative	Negative	Negative	Negative	Negative	Negative	Negative	Negative	Negative	Negative	Negative	Negative	negative	Negative	Negative
BE077	48	2	1	10	No	4	No	Yes	Yes	In the last week	Absent		Positive	Negative	Positive	Positive	Negative	Negative	Negative	Negative	Negative	Negative	Negative	Negative	Mycoplasma hominis, Ureplasmas species	MH,UU	Positive	negative	multiple infection	MH,UU
BE078	37	1	1	2	No	4	No	Yes	Yes	In the last week	Absent		Negative	Negative	Negative	Positive	Negative	Negative	Negative	Negative	Negative	Negative	Negative	Negative	Ureplasmas species	UU	Positive	negative	single infection	UU
BE079	67	1	1	2	No	0	No	Yes	Yes	In the last week	Absent		Negative	Negative	Positive	Negative	Negative	Negative	Negative	Negative	Negative	Negative	Negative	Negative	Mycoplasma hominis	MH	Positive	negative	single infection	MH
BE080	49	1	1	2	No	3	Yes	Yes	No		Absent		Negative	Negative	Positive	Positive	Negative	Negative	Negative	Negative	Negative	Negative	Negative	Negative	Mycoplasma hominis, Ureplasmas species	MH,UU	Positive	negative	multiple infection	MH,UU
BE081	37	1	1	2	No	5	Yes	Yes	No		Absent		Positive	Negative	Positive	Positive	Negative	Negative	Negative	Negative	Negative	Negative	Negative	Negative	Mycoplasma hominis, Ureplasmas species	MH,UU	Positive	negative	multiple infection	MH,UU
BE082	53	1	1	3	Yes	1	No	Yes	No		Absent		Negative	Positive	Positive	Positive	Negative	Negative	Negative	Negative	Negative	Negative	Negative	Negative	Mycoplasma hominis, Ureplasmas species	MH,UU	Positive	negative	multiple infection	MH,UU,HPV
BE083	42	1	1	2	No	1	No	Yes	No		Absent		Negative	Positive	Negative	Positive	Negative	Negative	Negative	Negative	Negative	Negative	Negative	Negative	Ureplasmas species	UU	Positive	negative	multiple infection	UU,HPV
BE084	54	0	0	2	Yes	0	No	Yes	No		Absent		Positive	Negative	Negative	Negative	Negative	Negative	Negative	Negative	Negative	Negative	Negative	Negative	Negative	Negative	Negative	negative	Negative	Negative
BE085	51	1	1	1	Yes	1	No	Yes	No		Absent		Negative	Negative	Positive	Positive	Negative	Negative	Negative	Negative	Negative	Negative	Negative	Negative	Mycoplasma hominis, Ureplasmas species	MH,UU	Positive	negative	multiple infection	MH,UU
BE086	43	0	0	3	No	0	No	No	No		Absent		Negative	Negative	Negative	Positive	Negative	Negative	Negative	Negative	Negative	Negative	Negative	Negative	Ureplasmas species	UU	Positive	negative	single infection	UU
BE087	30	2	2	4	No	3	Yes	Yes	No		Absent		Positive	Negative	Negative	Positive	Positive	Negative	Negative	Negative	Negative	Negative	Negative	Negative	Ureplasmas species, Tricomonas vaginalis	UU,TV	Positive	positive	multiple infection	UU,TV
BE088	49	1	1	3	Yes	3	No	Yes	Yes	In the last week	Absent		Negative	Negative	Negative	Positive	Negative	Negative	Negative	Negative	Negative	Negative	Negative	Negative	Ureplasmas species	UU	Positive	negative	single infection	UU
BE089	75	1	1	3	Yes	0	No	Yes	No		Absent		Negative	Positive	Negative	Negative	Negative	Negative	Negative	Negative	Negative	Negative	Negative	Negative	Negative	Negative	Negative	negative	single infection	HPV
BE090	34	1	1	3	Yes	0	No	Yes	No		Absent		Positive	Positive	Negative	Negative	Negative	Negative	Negative	Negative	Negative	Negative	Negative	Negative	Negative	Negative	Negative	negative	single infection	HPV
BE091	35	2	1	4	Yes	0	No	Yes	Yes	In the last week	Absent		Positive	Positive	Negative	Positive	Negative	Negative	Positive	Negative	Negative	Negative	Negative	Negative	Ureplasmas species, Herpes simplex virus-2	UU,HSV-2	Positive	negative	multiple infection	UU,HSV-2,HPV
BE093	31	5	1	5	Yes	5	Yes	Yes	No		Absent		Negative	Positive	Negative	Positive	Negative	Negative	Negative	Negative	Negative	Negative	Negative	Negative	Ureplasmas species	UU	Positive	negative	multiple infection	UU,HPV
BE094	45	1	1	3	Yes	4	Yes	Yes	No		Absent		Positive	Negative	Positive	Negative	Negative	Negative	Negative	Negative	Negative	Negative	Negative	Negative	Mycoplasma hominis	MH	Positive	negative	single infection	MH
BE095	65	0	0	1	No	0	No	Yes	Yes	More than 6 months ago	Absent		Negative	Negative	Positive	Negative	Negative	Negative	Negative	Negative	Negative	Negative	Negative	Negative	Mycoplasma hominis	MH	Positive	negative	single infection	MH
BE096	53	1	1	5	No	4	No	Yes	Yes	In the last week	Absent		Negative	Negative	Negative	Positive	Negative	Negative	Negative	Negative	Negative	Negative	Negative	Negative	Ureplasmas species	UU	Positive	negative	single infection	UU
BE097	59	1	1	1	No	2	No	Yes	No		Absent		Negative	Negative	Positive	Positive	Negative	Negative	Negative	Negative	Negative	Negative	Negative	Negative	Mycoplasma hominis, Ureplasmas species	MH,UU	Positive	negative	multiple infection	MH,UU
BE098	53	1	1	2	No	12	No	Yes	Yes	In the last week	Present	Vaginal bleeding post menopausal	Negative	Negative	Negative	Positive	Negative	Negative	Negative	Negative	Negative	Negative	Negative	Negative	Ureplasmas species	UU	Positive	negative	single infection	UU
BE099	39	1	1	3	No	4	No	Yes	Yes	Current	Absent		Negative	Positive	Positive	Positive	Negative	Negative	Negative	Negative	Negative	Negative	Negative	Negative	Mycoplasma hominis, Ureplasmas species	MH,UU	Positive	negative	multiple infection	MH,UU,HPV
BE100	39	1	1	6	No	1	No	Yes	Yes	Current	Present	whitish PV discharge	Positive	Negative	Positive	Positive	Negative	Negative	Negative	Negative	Negative	Negative	Negative	Negative	Mycoplasma hominis, Ureplasmas species	MH,UU	Positive	negative	multiple infection	MH,UU
BE101	48	0	0	2	No	0	No	Yes	Yes	More than 1 month but less than 6 months	Absent		Negative	Negative	Negative	Negative	Negative	Negative	Negative	Negative	Negative	Negative	Negative	Negative	Negative	Negative	Negative	negative	Negative	Negative
BE102	60	1	1	2	No	1	No	Yes	No		Absent		Negative	Negative	Negative	Positive	Negative	Negative	Negative	Negative	Negative	Negative	Negative	Negative	Ureplasmas species	UU	Positive	negative	single infection	UU
BE103	33	1	1	2	No	8	No	Yes	No		Absent		Positive	Positive	Negative	Positive	Negative	Negative	Negative	Negative	Negative	Negative	Negative	Negative	Ureplasmas species	UU	Positive	negative	multiple infection	UU,HPV
BE105	53	1	0	3	No	0	No	Yes	No		Present	Slight bleeding from cervical OS.	Negative	Negative	Negative	Negative	Negative	Negative	Negative	Negative	Negative	Negative	Negative	Negative	Negative	Negative	Negative	negative	Negative	Negative
BE106	40	1	1	7	Yes	2	Yes	Yes	Yes		Absent		Negative	Positive	Positive	Positive	Positive	Negative	Negative	Negative	Negative	Negative	Negative	Negative	Mycoplasma hominis, Ureplasmas species, Tricomonas vaginalis	MH,UU,TV	Positive	positive	multiple infection	MH,UU,TV,HPV
BE107	32	1	1	1	No	3	Yes	Yes	No		Absent		Negative	Negative	Negative	Positive	Negative	Negative	Negative	Negative	Negative	Negative	Negative	Negative	Ureplasmas species	UU	Positive	negative	single infection	UU
BE108	45	0	0	2	Yes	0	No	Yes	No		Absent		Negative	Positive	Negative	Positive	Negative	Negative	Negative	Negative	Negative	Negative	Negative	Negative	Ureplasmas species	UU	Positive	negative	multiple infection	UU,HPV
BE109	59	0	0	2	No	0	No	Yes	No		Absent		Negative	Negative	Negative	Negative	Negative	Negative	Negative	Negative	Negative	Negative	Negative	Negative	Negative	Negative	Negative	negative	Negative	Negative
BE110	37	2	1	7	No	5	No	Yes	Yes	More than 1 week but less than a month ago	Absent		Negative	Positive	Positive	Positive	Negative	Negative	Negative	Negative	Negative	Negative	Negative	Negative	Mycoplasma hominis, Ureplasmas species	MH,UU	Positive	negative	multiple infection	MH,UU,HPV
BE111	43	1	0	5	Yes	0	Yes	Yes	Yes	More than 6 months ago	Present	Bleeding per vagina has irregular menses.	Negative	Negative	Positive	Positive	Negative	Negative	Negative	Negative	Negative	Negative	Negative	Negative	Mycoplasma hominis, Ureplasmas species	MH,UU	Positive	negative	multiple infection	MH,UU
BE112	53	1	1	3	No	2	No	No	No		Absent		Negative	Negative	Negative	Positive	Negative	Negative	Negative	Negative	Negative	Negative	Negative	Negative	Ureplasmas species	UU	Positive	negative	single infection	UU
BE113	53	1	1	2	Yes	1	No	Yes	Yes	More than 1 month but less than 6 months	Absent		Negative	Negative	Negative	Negative	Negative	Negative	Negative	Negative	Negative	Negative	Negative	Negative	Negative	Negative	Negative	negative	Negative	Negative
BE114	49	1	1	5	No	1	No	Yes	No		Absent		Negative	Negative	Negative	Positive	Negative	Negative	Negative	Negative	Negative	Negative	Negative	Negative	Ureplasmas species	UU	Positive	negative	single infection	UU
BE115	47	1	0	2	No	0	No	Yes	Yes	Current	Present	Whitish cream PV discharge.	Negative	Negative	Negative	Positive	Negative	Negative	Negative	Negative	Negative	Negative	Negative	Negative	Ureplasmas species	UU	Positive	negative	single infection	UU
BE116	31	1	1	6	Yes	0	Yes	Yes	No		Absent		Positive	Positive	Positive	Positive	Negative	Negative	Negative	Negative	Negative	Negative	Negative	Negative	Mycoplasma hominis, Ureplasmas species	MH,UU	Positive	negative	multiple infection	MH,UU,HPV
BE117	40	1	1	4	Yes	4	Yes	Yes	No		Absent		Positive	Negative	Negative	Negative	Negative	Negative	Negative	Negative	Negative	Negative	Negative	Negative	Negative	Negative	Negative	negative	Negative	Negative
BE118	46	1	1	3	Yes	0	Yes	Yes	Yes	Current	Present	Creamish PV dischage.	Positive	Negative	Negative	Positive	Negative	Negative	Negative	Negative	Negative	Negative	Negative	Negative	Ureplasmas species	UU	Positive	negative	single infection	UU
BE119	52	1	1	2	No	2	No	Yes	No		Absent		Negative	Negative	Positive	Positive	Negative	Negative	Negative	Negative	Negative	Negative	Negative	Negative	Mycoplasma hominis, Ureplasmas species	MH,UU	Positive	negative	multiple infection	MH,UU
BE120	75	0	0	2	No	0		Yes	No		Absent		Negative	Negative	Negative	Positive	Negative	Negative	Negative	Negative	Negative	Negative	Negative	Negative	Ureplasmas species	UU	Positive	negative	single infection	UU
BE121	69	0	0	1	No	0	No	Yes	No		Absent		Negative	Negative	Negative	Positive	Negative	Negative	Negative	Negative	Negative	Negative	Negative	Negative	Ureplasmas species	UU	Positive	negative	single infection	UU
BE122	41	1	1	1	Yes	8	Yes	Yes	No		Absent		Negative	Negative	Negative	Negative	Negative	Negative	Negative	Negative	Negative	Negative	Negative	Negative	Negative	Negative	Negative	negative	Negative	Negative
BE123	39	2	1	4	No	4	Yes	Yes	No		Absent		Positive	Negative	Negative	Negative	Negative	Negative	Negative	Negative	Positive	Negative	Negative	Negative	Neisseria gonorrhoeae	NG	Positive	positive	single infection	NG
BE124	32	1	1	1	No	3	Yes	Yes	No		Present	Whitish PV discharge.	Positive	Positive	Negative	Positive	Negative	Negative	Negative	Negative	Negative	Negative	Negative	Negative	Ureplasmas species	UU	Positive	negative	multiple infection	UU,HPV
BE125	33	1	0	3	No	0	Yes	Yes	No		Absent		Negative	Negative	Negative	Negative	Negative	Negative	Negative	Negative	Negative	Positive	Negative	Negative	Mycoplasma genitalium	MG	Positive	negative	single infection	MG
BE126	43	1	1	3	No	2	Yes	No	Yes	Current	Absent		Positive	Positive	Positive	Negative	Negative	Negative	Negative	Negative	Negative	Negative	Negative	Negative	Mycoplasma hominis	MH	Positive	negative	multiple infection	MH,HPV
BE127	53	0	0	3	Yes	0	No	No	No		Present	Yellowish white PV discharge.	Positive	Negative	Negative	Negative	Negative	Negative	Negative	Negative	Negative	Negative	Negative	Negative	Negative	Negative	Negative	negative	Negative	Negative
BE128	38	1	1	1	No	1	No	Yes	No		Absent		Negative	Negative	Positive	Positive	Negative	Negative	Negative	Negative	Negative	Negative	Negative	Negative	Mycoplasma hominis, Ureplasmas species	MH,UU	Positive	negative	multiple infection	MH,UU
BE129	48	1	1	1	Yes	1	Yes	Yes	Yes	In the last week	Absent		Negative	Negative	Negative	Negative	Negative	Negative	Negative	Negative	Negative	Negative	Negative	Negative	Negative	Negative	Negative	negative	Negative	Negative
BE130	53	0	0	2	No	0	No	Yes	No		Absent		Negative	Negative	Positive	Positive	Positive	Negative	Negative	Negative	Negative	Negative	Negative	Negative	Mycoplasma hominis, Ureplasmas species, Tricomonas vaginalis	MH,UU,TV	Positive	positive	multiple infection	MH,UU,TV
BE131	40	1	1	3	Yes	1	Yes	Yes	No		Absent		Negative	Positive	Negative	Positive	Negative	Negative	Negative	Negative	Negative	Negative	Negative	Negative	Ureplasmas species	UU	Positive	negative	multiple infection	UU,HPV
BE132	37	0	0	5	Yes	0	No	Yes	Yes	More than 6 months ago	Absent		Negative	Positive	Negative	Positive	Positive	Negative	Negative	Negative	Negative	Negative	Negative	Negative	Ureplasmas species, Tricomonas vaginalis	UU,TV	Positive	positive	multiple infection	UU,TV,HPV
BE133	75	0	0	2	No	0	No	Yes	Yes	More than 6 months ago	Absent		Negative	Negative	Negative	Negative	Negative	Negative	Negative	Negative	Negative	Negative	Negative	Negative	Negative	Negative	Negative	negative	Negative	Negative
BE135	35	1	0	4	No	0	No	Yes	Yes	More than 1 month but less than 6 months	Absent		Negative	Negative	Negative	Negative	Negative	Negative	Negative	Negative	Negative	Negative	Negative	Negative	Negative	Negative	Negative	negative	Negative	Negative
BE136	39	1	0	2	No	5	Yes	Yes	Yes	More than 1 week but less than a month ago	Present	PV bleeding on menstrual period.	Positive	Negative	Positive	Positive	Negative	Negative	Negative	Negative	Negative	Negative	Negative	Negative	Mycoplasma hominis, Ureplasmas species	MH,UU	Positive	negative	multiple infection	MH,UU
BE137	46	1	1	2	Yes	3	Yes	Yes	No		Absent		Positive	Negative	Negative	Positive	Negative	Negative	Negative	Negative	Negative	Negative	Negative	Negative	Ureplasmas species	UU	Positive	negative	single infection	UU
BE138	44	0	0	1	Yes	0	No	Yes	No		Absent		Negative	Negative	Negative	Positive	Negative	Negative	Negative	Negative	Negative	Negative	Negative	Negative	Ureplasmas species	UU	Positive	negative	single infection	UU
BE139	41	1	1	4	No	1	No	Yes	Yes	More than 6 months ago	Absent		Negative	Negative	Negative	Positive	Negative	Negative	Negative	Negative	Negative	Negative	Negative	Negative	Ureplasmas species	UU	Positive	negative	single infection	UU
BE140	33	1	1	4	No	0	No	Yes	Yes	More than 6 months ago	Absent		Positive	Positive	Negative	Negative	Negative	Negative	Negative	Negative	Negative	Negative	Negative	Negative	Negative	Negative	Negative	negative	single infection	HPV
BE141	60	1	0	2	No	0	No	Yes	No		Absent		Negative	Negative	Negative	Positive	Negative	Negative	Negative	Negative	Negative	Negative	Negative	Negative	Ureplasmas species	UU	Positive	negative	single infection	UU
BE142	38	1	1	5	Yes	0	Yes	Yes	No		Absent		Positive	Negative	Positive	Positive	Negative	Negative	Negative	Negative	Negative	Negative	Negative	Negative	Mycoplasma hominis, Ureplasmas species	MH,UU	Positive	negative	multiple infection	MH,UU
BE143	37	1	1	4	No	20	No	Yes	Yes	More than 6 months ago	Absent		Negative	Negative	Negative	Negative	Negative	Negative	Negative	Negative	Negative	Negative	Negative	Negative	Negative	Negative	Negative	negative	Negative	Negative
BE144	54	0	0	2	Yes	0	Yes	Yes	No		Absent		Negative	Negative	Negative	Negative	Negative	Negative	Negative	Negative	Negative	Negative	Negative	Negative	Negative	Negative	Negative	negative	Negative	Negative
BE145	65	0	0	1	No	0	No	Yes	Yes	More than 1 month but less than 6 months	Absent		Negative	Positive	Negative	Negative	Negative	Negative	Negative	Negative	Negative	Negative	Negative	Negative	Negative	Negative	Negative	negative	single infection	HPV
BE146	51	1	1	2	Yes	1	Yes	Yes	Yes	More than 1 month but less than 6 months	Absent		Negative	Negative	Negative	Negative	Negative	Negative	Negative	Negative	Negative	Negative	Negative	Negative	Negative	Negative	Negative	negative	Negative	Negative
BE147	36	1	0	5	Yes	0	Yes	Yes	Yes	More than 1 week but less than a month ago	Absent		Positive	Negative	Positive	Positive	Positive	Negative	Negative	Negative	Negative	Negative	Negative	Negative	Mycoplasma hominis, Ureplasmas species, Tricomonas vaginalis	MH,UU,TV	Positive	positive	multiple infection	MH,UU,TV
BE148	38	1	1	3	Yes	2	Yes	Yes	No		Absent		Positive	Negative	Negative	Negative	Negative	Negative	Negative	Negative	Negative	Negative	Negative	Negative	Negative	Negative	Negative	negative	Negative	Negative
BE149	51	0	0	4	Yes	0	Yes	Yes	No		Absent		Negative	Negative	Positive	Positive	Positive	Negative	Negative	Negative	Negative	Negative	Negative	Negative	Mycoplasma hominis, Ureplasmas species, Tricomonas vaginalis	MH,UU,TV	Positive	positive	multiple infection	MH,UU,TV
BE150	39	1	2	7	No	1	No	Yes	Yes	More than 6 months ago	Present	Whitish PV discharge	Positive	Negative	Positive	Negative	Negative	Negative	Negative	Negative	Negative	Negative	Negative	Negative	Positive	MH	Positive	negative	single infection	MH
BE151	41	1	0	4	No	0	Yes	Yes	Yes	In the last week	Present	Whitish cream PV discharge.	Positive	Positive	Negative	Positive	Negative	Negative	Negative	Negative	Negative	Negative	Negative	Negative	Ureplasmas species	UU	Positive	negative	multiple infection	UU,HPV
BE152	64	1	1	3	No	2	No	Yes	No		Present	Whitish PV discharge.	Negative	Negative	Negative	Positive	Positive	Negative	Negative	Negative	Negative	Negative	Negative	Negative	Ureplasmas species, Tricomonas vaginalis	UU,TV	Positive	positive	multiple infection	UU,TV
BE154	39	0	1	2	Yes	2	Yes	Yes	Yes	More than 6 months ago	Present		Negative	Negative	Positive	Positive	Positive	Negative	Negative	Negative	Negative	Negative	Negative	Negative	Mycoplasma hominis, Ureplasmas species, Tricomonas vaginalis	MH,UU,TV	Positive	positive	multiple infection	MH,UU,TV
BE156	32	1	0	3	No	0	Yes	Yes	Yes	In the last week	Present	Whitish PV discharge.	Positive	Negative	Negative	Negative	Positive	Negative	Negative	Negative	Negative	Negative	Negative	Negative	Tricomonas vaginalis	TV	Positive	positive	single infection	TV
BE157	56	0	0	3	Yes	0	Yes	Yes	No		Absent		Negative	Negative	Positive	Positive	Positive	Negative	Negative	Negative	Negative	Negative	Negative	Negative	Mycoplasma hominis, Ureplasmas species, Tricomonas vaginalis	MH,UU,TV	Positive	positive	multiple infection	MH,UU,TV
BE158	36	2	1	7	Yes	2	Yes	Yes	Yes	More than 6 months ago	Absent		Positive	Negative	Positive	Positive	Negative	Negative	Positive	Negative	Negative	Negative	Negative	Negative	Mycoplasma homonis, Ureplasmas species, Herpes simplex virus-2	MH,UU,HSV-2	Positive	negative	multiple infection	MH,UU,HSV-2
BE159	37	3	1	3	No	2	Yes	Yes	Yes	More than 6 months ago	Present	Whitsh PV discharge.	Positive	Positive	Positive	Positive	Positive	Negative	Negative	Negative	Negative	Negative	Negative	Negative	Mycoplasma hominis, Ureplasmas species, Tricomonas vaginalis	MH,UU,TV	Positive	positive	multiple infection	MH,UU,TV,HPV
BE160	42	1	1	3	No	4	No	Yes	Yes	More than 6 months ago	Absent		Positive	Negative	Positive	Positive	Negative	Negative	Negative	Negative	Negative	Negative	Negative	Negative	Mycoplasma hominis, Ureplasmas species	MH,UU	Positive	negative	multiple infection	MH,UU
BE161	53	0	0	6	No	0	No	Yes	Yes	More than 1 month but less than 6 months	Absent		Positive	Positive	Negative	Positive	Negative	Negative	Positive	Negative	Negative	Negative	Negative	Negative	Ureplasmas species, Herpes simplex virus-2	UU,HSV-2	Positive	negative	multiple infection	UU,HSV-2,HPV
BE163	36	1	1	2	No	2	Yes	Yes	Yes	More than 1 month but less than 6 months	Present	White PV discharge.	Negative	Negative	Negative	Positive	Negative	Negative	Negative	Negative	Negative	Negative	Negative	Negative	Ureplasmas species	UU	Positive	negative	single infection	UU
BE164	33	2	1	7	Yes	2	Yes	Yes	Yes	More than 6 months ago	Absent		Positive	Negative	Negative	Positive	Negative	Negative	Negative	Positive	Negative	Negative	Negative	Negative	Ureplasmas species, Chlamydia tracomonas (Serotypes L1-L3=Lymphogranuloma Venereum)	UU,CT	Positive	positive	multiple infection	UU,CT
BE165	30	1	1	3	No	7	Yes	Yes	Yes	More than 1 month but less than 6 months	Absent		Negative	Negative	Negative	Positive	Positive	Negative	Negative	Negative	Negative	Negative	Negative	Negative	Ureplasmas species, Tricomonas vaginalis	UU,TV	Positive	positive	multiple infection	UU,TV
BE166	49	1	1	4	No	4	Yes	Yes	Yes	More than 1 month but less than 6 months	Absent		Positive	Positive	Negative	Positive	Negative	Negative	Negative	Negative	Negative	Negative	Negative	Negative	Ureplasmas species	UU	Positive	negative	multiple infection	UU,HPV
BE168	41	0	0	3	No	0	No	Yes	Yes	In the last week	Absent		Negative	Positive	Negative	Positive	Negative	Negative	Negative	Negative	Negative	Negative	Negative	Negative	Ureplasmas species	UU	Positive	negative	multiple infection	UU,HPV
BE169	52	1	1	1	No	7	No	Yes	Yes	More than 1 month but less than 6 months	Present	Creamish white PV discharge.	Negative	Negative	Negative	Negative	Negative	Negative	Negative	Negative	Negative	Negative	Negative	Negative	Negative	Negative	Negative	negative	Negative	Negative
BE170	49	1	1	3	No	2	No	Yes	Yes	More than 1 month but less than 6 months	Absent		Negative	Negative	Positive	Positive	Negative	Negative	Negative	Negative	Negative	Negative	Negative	Negative	Mycoplasma hominis, Ureplasmas species	MH,UU	Positive	negative	multiple infection	MH,UU
BE172	53	1	0	2	Yes	0	No	Yes	Yes	More than 1 month but less than 6 months	Absent		Negative	Negative	Negative	Negative	Negative	Negative	Negative	Negative	Negative	Negative	Negative	Negative	Negative	Negative	Negative	negative	Negative	Negative
BE173	64	0	0	2	No	0	No	Yes	Yes	More than 6 months ago	Absent		Negative	Negative	Negative	Negative	Positive	Negative	Negative	Negative	Negative	Negative	Negative	Negative	Tricomonas vaginalis	TV	Positive	positive	single infection	TV
BE174	47	1	1	2	Yes	2	Yes	Yes	Yes	In the last week	Present	Whitish PV discharge.	Negative	Positive	Positive	Positive	Positive	Negative	Negative	Negative	Negative	Positive	Negative	Negative	Mycoplasma hominis, Ureplasmas species, Tricomonas vaginalis, Mycoplasma genitalium	MH,UU,TV,MG	Positive	positive	multiple infection	MH,UU,TV,MG,HPV
BE175	39	2	1	2	Yes	8	Yes	Yes	Yes	In the last week	Present	Creamish white PV discharge.	Negative	Positive	Negative	Positive	Negative	Negative	Negative	Negative	Negative	Negative	Negative	Negative	Ureplasmas species	UU	Positive	negative	multiple infection	UU,HPV
BE176	34	2	1	4	Yes	1	Yes	Yes	Yes	More than 6 months ago	Absent		Positive	Negative	Positive	Positive	Negative	Negative	Negative	Negative	Negative	Negative	Negative	Negative	Mycoplasma hominis, Ureplasmas species	MH,UU	Positive	negative	multiple infection	MH,UU
BE177	32	2	1	3	No	2	Yes	Yes	Yes	More than 6 months ago	Absent		Negative	Negative	Negative	Positive	Negative	Negative	Negative	Negative	Negative	Negative	Negative	Negative	Ureplasmas species	UU	Positive	negative	single infection	UU
BE178	55	0	0	3	No	0	No	Yes	Yes	More than 6 months ago	Absent		Negative	Negative	Negative	Positive	Positive	Negative	Negative	Negative	Negative	Negative	Negative	Negative	Ureplasmas species, Tricomonas vaginalis	UU,TV	Positive	positive	multiple infection	UU,TV
BE179	46	1	1	3	Yes	3	Yes	Yes	Yes	More than 6 months ago	Present	Whitsh PV discharge.	Negative	Negative	Negative	Positive	Negative	Negative	Negative	Negative	Negative	Negative	Negative	Negative	Ureplasmas species	UU	Positive	negative	single infection	UU
BE180	34	0	1	5	No	1	No	Yes	Yes	More than 6 months ago	Absent		Positive	Negative	Positive	Positive	Positive	Negative	Negative	Negative	Negative	Negative	Negative	Negative	Mycoplasma hominis, Ureplasmas species, Tricomonas vaginalis	MH,UU,TV	Positive	positive	multiple infection	MH,UU,TV
BE181	45	1	0	2	Yes	0	Yes	Yes	No		Absent		Negative	Positive	Negative	Positive	Negative	Negative	Negative	Negative	Negative	Negative	Negative	Negative	Ureplasmas species	UU	Positive	negative	multiple infection	UU,HPV
BE182	53	0	0	2	No	0	No	Yes	Yes	More than 6 months ago	Absent		Positive	Negative	Negative	Negative	Negative	Negative	Negative	Negative	Negative	Negative	Negative	Negative	Negative	Negative	Negative	negative	Negative	Negative
BE183	34	1	1	4	No	3	No	Yes	Yes	More than 6 months ago	Absent		Negative	Negative	Positive	Positive	Negative	Negative	Negative	Negative	Negative	Negative	Negative	Negative	Mycoplasma homonis, Ureplasmas species	MH, UU	Positive	negative	multiple infection	MH,UU
BE184	40	1	1	1	No	2	Yes	Yes	No		Absent		Positive	Negative	Positive	Positive	Negative	Negative	Negative	Negative	Negative	Negative	Negative	Negative	Mycoplasma hominis, Ureplasmas species	MH,UU	Positive	negative	multiple infection	MH,UU
BE185	40	3	0	4	No	0	No	Yes	No		Present	Whitish thick PV discharge.	Positive	Negative	Positive	Positive	Positive	Negative	Negative	Negative	Negative	Negative	Negative	Negative	Mycoplasma hominis, Ureplasmas species, Tricomonas vaginalis	MH,UU,TV	Positive	positive	multiple infection	MH,UU,TV
BE186	52	1	1	3	No	2	No	No	Yes	More than 6 months ago	Absent		Negative	Negative	Positive	Positive	Negative	Negative	Negative	Negative	Negative	Negative	Negative	Negative	Mycoplasma hominis, Ureplasmas species	MH,UU	Positive	negative	multiple infection	MH,UU
BE188	40	1	1	2	No	1	Yes	Yes	Yes	In the last week	Present	Severe cream watery PV discharge.	Negative	Positive	Positive	Positive	Positive	Negative	Positive	Negative	Negative	Negative	Negative	Negative	Mycoplasma hominis, Ureplasmas species, Tricomonas vaginalis, Herpes simplex virus	MH,UU,TV,HSV-2	Positive	positive	multiple infection	MH,UU,TV,HSV-2,HPV
BE189	47	1	0	3	No	0	No	Yes	Yes	In the last week	Absent		Positive	Positive	Negative	Positive	Negative	Negative	Negative	Negative	Negative	Negative	Negative	Negative	Ureplasmas species	UU	Positive	negative	multiple infection	UU,HPV
BE190	32	3	0	4	Yes	0	Yes	Yes	Yes	In the last week	Present	Whitish PV discharge.	Negative	Negative	Negative	Negative	Negative	Negative	Positive	Negative	Negative	Negative	Negative	Negative	Herpes simplex virus-2	HSV-2	Positive	negative	single infection	HSV-2
BE191	51	1	0	3	No	0	No	Yes	Yes	More than 6 months ago	Absent		Positive	Negative	Negative	Positive	Negative	Negative	Negative	Negative	Negative	Negative	Negative	Negative	Ureplasmas species	UU	Positive	negative	single infection	UU
BE193	33	1	1	4	No	0	Yes	Yes	Yes	Current	Present	Whitish thick PV discharge.	Negative	Negative	Negative	Negative	Negative	Negative	Negative	Negative	Negative	Negative	Negative	Negative	Negative	Negative	Negative	negative	Negative	Negative
BE194	52	0	0	2	No	0	No	Yes	Yes	More than 6 months ago	Absent		Negative	Negative	Negative	Negative	Negative	Negative	Negative	Negative	Negative	Negative	Negative	Negative	Negative	Negative	Negative	negative	Negative	Negative
BE195	41	0	0	3	Yes	0	No	Yes	Yes	More than 1 month but less than 6 months	Absent		Negative	Negative	Positive	Negative	Negative	Negative	Negative	Negative	Negative	Negative	Negative	Negative	Mycoplasma hominis	MH	Positive	negative	single infection	MH
BE196	38	1	1	7	No	2	No	No	Yes	Current	Present	Whitish cream PV discharge.	Negative	Negative	Negative	Positive	Negative	Negative	Negative	Negative	Negative	Negative	Negative	Negative	Ureplasmas species	UU	Positive	negative	single infection	UU
BE197	40	1	1	2	No	2	No	No	No		Absent		Negative	Negative	Negative	Positive	Negative	Negative	Negative	Negative	Negative	Negative	Negative	Negative	Ureplasmas species	UU	Positive	negative	single infection	UU
BE198	58	1	1	4	Yes	2	Yes	Yes	No		Absent		Negative	Negative	Negative	Positive	Positive	Negative	Negative	Negative	Negative	Negative	Negative	Negative	Ureplasmas species, Tricomonas vaginalis	UU,TV	Positive	positive	multiple infection	UU,TV
BE199	40	1	1	4	No	12	Yes	Yes	Yes	More than 1 month but less than 6 months	Absent		Positive	Positive	Negative	Positive	Negative	Negative	Negative	Negative	Negative	Negative	Negative	Negative	Ureplasmas species	UU	Positive	negative	multiple infection	UU,HPV
BE200	39	1	1	3	No	3	No	Yes	Yes	More than 6 months ago	Absent		Positive	Positive	Positive	Positive	Negative	Negative	Negative	Negative	Negative	Negative	Negative	Negative	Mycoplasma hominis, Ureplasmas species	MH,UU	Positive	negative	multiple infection	MH,UU,HPV
BE201	55	1	0	1	No	0	No	Yes	No		Absent		Negative	Positive	Negative	Positive	Positive	Negative	Negative	Negative	Negative	Negative	Negative	Negative	Ureplasmas species, Tricomonas vaginalis	UU,TV	Positive	positive	multiple infection	UU,TV,HPV
BE202	46	2	1	10	No	4	Yes	Yes	Yes	More than 6 months ago	Absent		Positive	Negative	Positive	Positive	Negative	Negative	Negative	Negative	Negative	Negative	Negative	Negative	Mycoplasma hominis, Ureplasmas species	MH,UU	Positive	negative	multiple infection	MH,UU
BE203	55	1	1	1	No	1	No	Yes	Yes	In the last week	Absent		Negative	Negative	Negative	Negative	Negative	Negative	Negative	Negative	Negative	Negative	Negative	Negative	Negative	Negative	Negative	negative	Negative	Negative
BE204	45	1	1	4	No	1	No	Yes	Yes	In the last week	Absent		Positive	Negative	Negative	Positive	Negative	Negative	Negative	Negative	Negative	Negative	Negative	Negative	Ureplasmas species	UU	Positive	negative	single infection	UU
BE205	32	2	1	7	No	4	Yes	Yes	Yes	More than 6 months ago	Absent		Positive	Negative	Negative	Positive	Negative	Negative	Negative	Negative	Negative	Negative	Negative	Negative	Ureplasmas species	UU	Positive	negative	single infection	UU
BE207	51	1	0	3	No	0	No	Yes	Yes	More than 6 months ago	Absent		Negative	Positive	Positive	Positive	Negative	Negative	Negative	Positive	Negative	Negative	Negative	Negative	Mycoplasma hominis, Ureplasmas species, Chlamydia trachomatis (Serotypes A-K)	MH,UU,CT	Positive	positive	multiple infection	MH,UU,CT,HPV
BE214	52	1	0	2	No	0	No	Yes	Yes	More than 1 month but less than 6 months	Absent		Negative	Positive	Negative	Positive	Negative	Negative	Negative	Negative	Negative	Negative	Negative	Negative	Ureplasmas species	UU	Positive	negative	multiple infection	UU,HPV
BE215	35	1	1	4	No	1	Yes	Yes	No		Absent		Positive	Positive	Negative	Positive	Negative	Negative	Negative	Negative	Negative	Negative	Negative	Negative	Ureplasmas species	UU	Positive	negative	multiple infection	UU,HPV
BE222	33	2	1	3	No	20	Yes	Yes	Yes	More than 6 months ago	Absent		Positive	Positive	Positive	Positive	Negative	Negative	Negative	Negative	Negative	Negative	Negative	Negative	Mycoplasma hominis, Ureplasmas species	MH,UU	Positive	negative	multiple infection	MH,UU,HPV
BE227	38	1	0	2	No	0	Yes	Yes	No		Absent		Positive	Positive	Negative	Positive	Negative	Negative	Negative	Negative	Positive	Negative	Negative	Negative	Ureplasmas species, Neisseria gonorrhoeae	UU,NG	Positive	positive	multiple infection	UU,NG,HPV
BE241	32	3	1	3	No	2	Yes	Yes	No		Absent		Positive	Positive	Positive	Negative	Negative	Negative	Positive	Negative	Negative	Negative	Negative	Negative	Mycoplasma hominis, Herpes simplex virus-2	MH,HSV-2	Positive	negative	multiple infection	MH,HSV-2,HPV
BE317	43	1	0	3	No	0	No	Yes	No		Absent		Negative	Positive	Negative	Negative	Negative	Negative	Negative	Negative	Negative	Negative	Negative	Negative	Negative	Negative	Negative	negative	single infection	HPV
BE327	59	0	0	2	No	0	No	Yes	Yes	In the last week	Absent		Positive	Negative	Positive	Positive	Negative	Negative	Negative	Negative	Negative	Negative	Negative	Negative	Mycoplasma hominis, Ureplasmas species	MH,UU	Positive	negative	multiple infection	MH,UU
BE333	43	0	0	3	No	0	No	Yes	No		Absent		Negative	Positive	Positive	Positive	Positive	Negative	Positive	Negative	Negative	Negative	Negative	Negative	Mycoplasma hominis, Ureplasmas species, Tricomonas vaginalis, Herpes simplex virus-2	MH,UU,TV,HSV-2	Positive	positive	multiple infection	MH,UU,TV,HSV-2,HPV
BE335	98	0	0	1	No	0	No	Yes	No		Absent		Negative	Positive	Negative	Negative	Negative	Negative	Negative	Negative	Negative	Negative	Negative	Negative	Negative	Negative	Negative	negative	single infection	HPV
BE365	37	1	1	4	Yes	5	Yes	Yes	Yes	More than 1 month but less than 6 months	Absent		Positive	Positive	Negative	Positive	Negative	Negative	Negative	Negative	Negative	Negative	Negative	Negative	Ureplasmas species	UU	Positive	negative	multiple infection	UU,HPV
BE375	45	1	0	1	No	0	No	Yes	Yes	More than 6 months ago	Present	Has creamish white PV discharge.	Negative	Negative	Positive	Negative	Negative	Negative	Negative	Negative	Negative	Negative	Negative	Negative	Mycoplasma hominis	MH	Positive	negative	single infection	MH
