# Supplementary material for: Detection of sexually transmitted pathogens and co-infection with human papillomavirus in women residing in rural Eastern Cape, South Africa
Source: PeerJ. 2021 Mar 3;9:e10793. doi: 10.7717/peerj.10793 (PMC7936566; doi:10.7717/peerj.10793)
Supplement: Supplemental Information 2 [file peerj-09-10793-s002.xlsx]

## Sheet: Sheet2
Study number	Have you had vaginal discharge that causes itching or foul smell that has caused you some worry?	Clinician Observation: Discharge	Clinician Observation: Discharge		Chlamydia trachomatis	Neisseria gonorrhoeae	Treponema pallidum	Overall prevalence of treatable STIs
BE002	No	Absent		Negative	Negative	Negative	Negative	negative
BE003	Yes	Absent		Negative	Negative	Negative	Negative	negative
BE004	No	Absent		Negative	Negative	Negative	Negative	negative
BE005	Yes	Absent		Negative	Negative	Negative	Negative	negative
BE006	Yes			Positive	Negative	Negative	Negative	positive
BE007	No	Absent		Negative	Negative	Negative	Negative	negative
BE008	Yes	Absent		Negative	Positive	Negative	Negative	positive
BE009	No	Absent		Positive	Negative	Negative	Negative	positive
BE010	No	Absent		Positive	Negative	Negative	Negative	positive
BE011	No	Absent		Negative	Negative	Negative	Negative	negative
BE012	Yes	Absent		Negative	Negative	Negative	Negative	negative
BE013	No	Absent		Positive	Positive	Positive	Negative	positive
BE014	Yes	Absent		Positive	Negative	Negative	Negative	positive
BE015	Yes	Present	Whitish Pv discharge	Negative	Negative	Negative	Negative	negative
BE016	Yes	Absent		Negative	Negative	Negative	Negative	negative
BE017	No	Absent		Negative	Negative	Negative	Negative	negative
BE018	No	Absent		Negative	Negative	Negative	Negative	negative
BE019	Yes	Absent		Negative	Negative	Negative	Negative	negative
BE020	Yes	Absent		Positive	Negative	Negative	Negative	positive
BE021	No	Absent		Negative	Negative	Negative	Negative	negative
BE022	No	Absent		Positive	Negative	Negative	Negative	positive
BE024	Yes	Absent		Negative	Negative	Negative	Negative	negative
BE025	Yes	Absent		Positive	Negative	Negative	Negative	positive
BE026	Yes	Absent		Negative	Negative	Negative	Negative	negative
BE027	Yes	Absent		Negative	Negative	Negative	Negative	negative
BE028	No	Absent		Negative	Negative	Negative	Negative	negative
BE029	Yes	Absent		Negative	Negative	Negative	Negative	negative
BE030	No	Absent		Positive	Negative	Negative	Negative	positive
BE031	No	Present	Whitish PV discharge.	Negative	Negative	Negative	Negative	negative
BE032	Yes	Present	Whitish PV discharge.	Negative	Negative	Negative	Negative	negative
BE033	No	Absent		Negative	Negative	Negative	Negative	negative
BE034	No	Present	Whitish PV discharge.	Negative	Negative	Negative	Negative	negative
BE035	Yes	Absent		Negative	Negative	Negative	Negative	negative
BE036	No	Absent		Negative	Negative	Negative	Negative	negative
BE037	Yes	Present	Whitish cream PV discharge	Negative	Negative	Negative	Negative	negative
BE038	No	Absent		Negative	Negative	Negative	Negative	negative
BE039	Yes	Absent		Negative	Negative	Negative	Negative	negative
BE040	No	Absent		Negative	Negative	Negative	Negative	negative
BE041	Yes	Present	Whitish PV discharge	Negative	Negative	Negative	Negative	negative
BE042	No	Absent		Negative	Negative	Negative	Negative	negative
BE043	Yes	Present	Whitish PV discharge.	Negative	Negative	Negative	Negative	negative
BE044	Yes	Present	Creamish white PV discharge	Positive	Negative	Negative	Negative	positive
BE045	Yes	Absent		Negative	Negative	Negative	Negative	negative
BE046	Yes	Present	Creamish PV discharge	Negative	Negative	Negative	Negative	negative
BE047	No	Absent		Negative	Negative	Negative	Negative	negative
BE048	No	Absent		Negative	Negative	Negative	Negative	negative
BE049	Yes	Absent		Negative	Negative	Negative	Negative	negative
BE050	No	Present		Negative	Negative	Negative	Negative	negative
BE051	No	Absent		Negative	Negative	Negative	Negative	negative
BE052	No	Absent		Negative	Negative	Negative	Negative	negative
BE053	Yes	Present	Creamish white PV discharge.	Negative	Negative	Negative	Negative	negative
BE054	Yes	Absent		Negative	Negative	Negative	Negative	negative
BE055	No	Absent		Negative	Negative	Negative	Negative	negative
BE056	No	Present	Whitish grey PV discharge.	Negative	Negative	Negative	Negative	negative
BE057	No	Absent		Negative	Negative	Negative	Negative	negative
BE058	No	Absent		Negative	Negative	Negative	Negative	negative
BE059	Yes	Absent		Negative	Negative	Negative	Negative	negative
BE060	No	Absent		Negative	Negative	Negative	Negative	negative
BE061	Yes	Present	Watery discharge	Positive	Negative	Negative	Negative	positive
BE062	No	Absent		Negative	Negative	Negative	Negative	negative
BE063	No	Absent		Negative	Negative	Negative	Negative	negative
BE064	No	Absent		Negative	Negative	Negative	Negative	negative
BE065	No	Absent		Negative	Negative	Negative	Negative	negative
BE066	Yes	Absent		Negative	Negative	Negative	Negative	negative
BE067	No	Present	White discharge.	Negative	Negative	Negative	Negative	negative
BE068	Yes	Present	White thick discharge	Negative	Negative	Negative	Negative	negative
BE069	No	Absent		Negative	Negative	Negative	Negative	negative
BE070	No	Present	whitish PV discharge	Negative	Positive	Negative	Negative	positive
BE071	Yes	Absent		Negative	Negative	Negative	Negative	negative
BE072	No	Absent		Negative	Negative	Negative	Negative	negative
BE073	Yes	Absent		Negative	Negative	Negative	Negative	negative
BE074	No	Absent		Negative	Negative	Negative	Negative	negative
BE075	Yes	Absent		Negative	Negative	Negative	Negative	negative
BE076	No	Absent		Negative	Negative	Negative	Negative	negative
BE077	Yes	Absent		Negative	Negative	Negative	Negative	negative
BE078	Yes	Absent		Negative	Negative	Negative	Negative	negative
BE079	Yes	Absent		Negative	Negative	Negative	Negative	negative
BE080	No	Absent		Negative	Negative	Negative	Negative	negative
BE081	No	Absent		Negative	Negative	Negative	Negative	negative
BE082	No	Absent		Negative	Negative	Negative	Negative	negative
BE083	No	Absent		Negative	Negative	Negative	Negative	negative
BE084	No	Absent		Negative	Negative	Negative	Negative	negative
BE085	No	Absent		Negative	Negative	Negative	Negative	negative
BE086	No	Absent		Negative	Negative	Negative	Negative	negative
BE087	No	Absent		Positive	Negative	Negative	Negative	positive
BE088	Yes	Absent		Negative	Negative	Negative	Negative	negative
BE089	No	Absent		Negative	Negative	Negative	Negative	negative
BE090	No	Absent		Negative	Negative	Negative	Negative	negative
BE091	Yes	Absent		Negative	Negative	Negative	Negative	negative
BE093	No	Absent		Negative	Negative	Negative	Negative	negative
BE094	No	Absent		Negative	Negative	Negative	Negative	negative
BE095	Yes	Absent		Negative	Negative	Negative	Negative	negative
BE096	Yes	Absent		Negative	Negative	Negative	Negative	negative
BE097	No	Absent		Negative	Negative	Negative	Negative	negative
BE098	Yes	Present	Vaginal bleeding post menopausal	Negative	Negative	Negative	Negative	negative
BE099	Yes	Absent		Negative	Negative	Negative	Negative	negative
BE100	Yes	Present	whitish PV discharge	Negative	Negative	Negative	Negative	negative
BE101	Yes	Absent		Negative	Negative	Negative	Negative	negative
BE102	No	Absent		Negative	Negative	Negative	Negative	negative
BE103	No	Absent		Negative	Negative	Negative	Negative	negative
BE105	No	Present	Slight bleeding from cervical OS.	Negative	Negative	Negative	Negative	negative
BE106	Yes	Absent		Positive	Negative	Negative	Negative	positive
BE107	No	Absent		Negative	Negative	Negative	Negative	negative
BE108	No	Absent		Negative	Negative	Negative	Negative	negative
BE109	No	Absent		Negative	Negative	Negative	Negative	negative
BE110	Yes	Absent		Negative	Negative	Negative	Negative	negative
BE111	Yes	Present	Bleeding per vagina has irregular menses.	Negative	Negative	Negative	Negative	negative
BE112	No	Absent		Negative	Negative	Negative	Negative	negative
BE113	Yes	Absent		Negative	Negative	Negative	Negative	negative
BE114	No	Absent		Negative	Negative	Negative	Negative	negative
BE115	Yes	Present	Whitish cream PV discharge.	Negative	Negative	Negative	Negative	negative
BE116	No	Absent		Negative	Negative	Negative	Negative	negative
BE117	No	Absent		Negative	Negative	Negative	Negative	negative
BE118	Yes	Present	Creamish PV dischage.	Negative	Negative	Negative	Negative	negative
BE119	No	Absent		Negative	Negative	Negative	Negative	negative
BE120	No	Absent		Negative	Negative	Negative	Negative	negative
BE121	No	Absent		Negative	Negative	Negative	Negative	negative
BE122	No	Absent		Negative	Negative	Negative	Negative	negative
BE123	No	Absent		Negative	Negative	Positive	Negative	positive
BE124	No	Present	Whitish PV discharge.	Negative	Negative	Negative	Negative	negative
BE125	No	Absent		Negative	Negative	Negative	Negative	negative
BE126	Yes	Absent		Negative	Negative	Negative	Negative	negative
BE127	No	Present	Yellowish white PV discharge.	Negative	Negative	Negative	Negative	negative
BE128	No	Absent		Negative	Negative	Negative	Negative	negative
BE129	Yes	Absent		Negative	Negative	Negative	Negative	negative
BE130	No	Absent		Positive	Negative	Negative	Negative	positive
BE131	No	Absent		Negative	Negative	Negative	Negative	negative
BE132	Yes	Absent		Positive	Negative	Negative	Negative	positive
BE133	Yes	Absent		Negative	Negative	Negative	Negative	negative
BE135	Yes	Absent		Negative	Negative	Negative	Negative	negative
BE136	Yes	Present	PV bleeding on menstrual period.	Negative	Negative	Negative	Negative	negative
BE137	No	Absent		Negative	Negative	Negative	Negative	negative
BE138	No	Absent		Negative	Negative	Negative	Negative	negative
BE139	Yes	Absent		Negative	Negative	Negative	Negative	negative
BE140	Yes	Absent		Negative	Negative	Negative	Negative	negative
BE141	No	Absent		Negative	Negative	Negative	Negative	negative
BE142	No	Absent		Negative	Negative	Negative	Negative	negative
BE143	Yes	Absent		Negative	Negative	Negative	Negative	negative
BE144	No	Absent		Negative	Negative	Negative	Negative	negative
BE145	Yes	Absent		Negative	Negative	Negative	Negative	negative
BE146	Yes	Absent		Negative	Negative	Negative	Negative	negative
BE147	Yes	Absent		Positive	Negative	Negative	Negative	positive
BE148	No	Absent		Negative	Negative	Negative	Negative	negative
BE149	No	Absent		Positive	Negative	Negative	Negative	positive
BE150	Yes	Present	Whitish PV discharge	Negative	Negative	Negative	Negative	negative
BE151	Yes	Present	Whitish cream PV discharge.	Negative	Negative	Negative	Negative	negative
BE152	No	Present	Whitish PV discharge.	Positive	Negative	Negative	Negative	positive
BE154	Yes	Present		Positive	Negative	Negative	Negative	positive
BE156	Yes	Present	Whitish PV discharge.	Positive	Negative	Negative	Negative	positive
BE157	No	Absent		Positive	Negative	Negative	Negative	positive
BE158	Yes	Absent		Negative	Negative	Negative	Negative	negative
BE159	Yes	Present	Whitsh PV discharge.	Positive	Negative	Negative	Negative	positive
BE160	Yes	Absent		Negative	Negative	Negative	Negative	negative
BE161	Yes	Absent		Negative	Negative	Negative	Negative	negative
BE163	Yes	Present	White PV discharge.	Negative	Negative	Negative	Negative	negative
BE164	Yes	Absent		Negative	Positive	Negative	Negative	positive
BE165	Yes	Absent		Positive	Negative	Negative	Negative	positive
BE166	Yes	Absent		Negative	Negative	Negative	Negative	negative
BE168	Yes	Absent		Negative	Negative	Negative	Negative	negative
BE169	Yes	Present	Creamish white PV discharge.	Negative	Negative	Negative	Negative	negative
BE170	Yes	Absent		Negative	Negative	Negative	Negative	negative
BE172	Yes	Absent		Negative	Negative	Negative	Negative	negative
BE173	Yes	Absent		Positive	Negative	Negative	Negative	positive
BE174	Yes	Present	Whitish PV discharge.	Positive	Negative	Negative	Negative	positive
BE175	Yes	Present	Creamish white PV discharge.	Negative	Negative	Negative	Negative	negative
BE176	Yes	Absent		Negative	Negative	Negative	Negative	negative
BE177	Yes	Absent		Negative	Negative	Negative	Negative	negative
BE178	Yes	Absent		Positive	Negative	Negative	Negative	positive
BE179	Yes	Present	Whitsh PV discharge.	Negative	Negative	Negative	Negative	negative
BE180	Yes	Absent		Positive	Negative	Negative	Negative	positive
BE181	No	Absent		Negative	Negative	Negative	Negative	negative
BE182	Yes	Absent		Negative	Negative	Negative	Negative	negative
BE183	Yes	Absent		Negative	Negative	Negative	Negative	negative
BE184	No	Absent		Negative	Negative	Negative	Negative	negative
BE185	No	Present	Whitish thick PV discharge.	Positive	Negative	Negative	Negative	positive
BE186	Yes	Absent		Negative	Negative	Negative	Negative	negative
BE188	Yes	Present	Severe cream watery PV discharge.	Positive	Negative	Negative	Negative	positive
BE189	Yes	Absent		Negative	Negative	Negative	Negative	negative
BE190	Yes	Present	Whitish PV discharge.	Negative	Negative	Negative	Negative	negative
BE191	Yes	Absent		Negative	Negative	Negative	Negative	negative
BE193	Yes	Present	Whitish thick PV discharge.	Negative	Negative	Negative	Negative	negative
BE194	Yes	Absent		Negative	Negative	Negative	Negative	negative
BE195	Yes	Absent		Negative	Negative	Negative	Negative	negative
BE196	Yes	Present	Whitish cream PV discharge.	Negative	Negative	Negative	Negative	negative
BE197	No	Absent		Negative	Negative	Negative	Negative	negative
BE198	No	Absent		Positive	Negative	Negative	Negative	positive
BE199	Yes	Absent		Negative	Negative	Negative	Negative	negative
BE200	Yes	Absent		Negative	Negative	Negative	Negative	negative
BE201	No	Absent		Positive	Negative	Negative	Negative	positive
BE202	Yes	Absent		Negative	Negative	Negative	Negative	negative
BE203	Yes	Absent		Negative	Negative	Negative	Negative	negative
BE204	Yes	Absent		Negative	Negative	Negative	Negative	negative
BE205	Yes	Absent		Negative	Negative	Negative	Negative	negative
BE207	Yes	Absent		Negative	Positive	Negative	Negative	positive
BE214	Yes	Absent		Negative	Negative	Negative	Negative	negative
BE215	No	Absent		Negative	Negative	Negative	Negative	negative
BE222	Yes	Absent		Negative	Negative	Negative	Negative	negative
BE227	No	Absent		Negative	Negative	Positive	Negative	positive
BE241	No	Absent		Negative	Negative	Negative	Negative	negative
BE317	No	Absent		Negative	Negative	Negative	Negative	negative
BE327	Yes	Absent		Negative	Negative	Negative	Negative	negative
BE333	No	Absent		Positive	Negative	Negative	Negative	positive
BE335	No	Absent		Negative	Negative	Negative	Negative	negative
BE365	Yes	Absent		Negative	Negative	Negative	Negative	negative
BE375	Yes	Present	Has creamish white PV discharge.	Negative	Negative	Negative	Negative	negative
